# Supplementary material for: Functionalisation of carbon dioxide by an iron(ii) complexElectronic supplementary information (ESI) available: experimental section. See http://www.rsc.org/suppdata/cc/b1/b108492e/
Source: Royal Society of Chemistry journal article supplement (doi:10.1039/b108492e), 2001-12-14
Supplement: b108492e.doc [file b108492e.doc]

**Supporting Information for**

**“Functionalisation of carbon dioxide by an iron(II) complex”**

Leslie D. Field,* Warren J. Shaw and Peter Turner.

*School of Chemistry, University of Sydney, New South Wales, 2006, Australia*

*E-mail: l.field@chem.usyd.edu.au*

**Experimental Section**

**General Information.** All manipulations were carried out using standard Schlenk, high vacuum, and glove-box techniques.1 Air-sensitive nmr samples were prepared by transfer of solvent *in vacuo* into an nmr tube, fitted with a concentric teflon valve,2 which had previously been charged with the sample in a nitrogen or argon filled glove-box. Tetrahydrofuran‑*d*8 and benzene‑*d*6 were dried over sodium/benzophenone and vacuum distilled immediately prior to use. Carbon dioxide (>99.995%) was obtained from British Oxygen Company (BOC Gases) and was used as supplied without further purification. Ethyl isothiocyanate was purchased from Aldrich Chemical Co. and was deoxygenated prior to use. The syntheses of *cis*‑Fe(dmpe)2H2,3 *cis*‑Fe(PP3)H2,4 have been described elsewhere. 1H, 2H, 31P, and 13C nmr spectra were recorded on a Bruker DRX400 nmr spectrometer at 400.132, 61.421, 161.979 and 100.623 MHz respectively. 1H nmr spectra were referenced to residual tetrahydrofuran‑*d*7 at  3.58, or benzene‑*d*5 at  7.15; chemical shifts in 2H nmr spectra were referenced to the corresponding 1H chemical shifts; 31P nmr spectra were referenced to external neat trimethylphosphite at  140.85; and 13C nmr spectra were referenced to tetrahydrofuran‑*d*8 at  67.4 or benzene‑*d*6 at  128.0. Infrared spectra were recorded on a Perkin Elmer 1600 Series FTIR spectrophotometer, the samples being pressed as KBr discs (KBr was dried *in vacuo* at 140 ºC beforehand).

**Reaction between *trans*‑Fe(dmpe)2(SCHNEt)H and CO2.** CO2 (1 atm) was added at 300 K to an nmr tube containing a degassed solution of *trans*‑Fe(dmpe)2(SCHNEt)H (**2**) in benzene‑*d*6 (0.5 mL) which had been prepared *in situ* by the reaction between *cis*‑Fe(dmpe)2H2 (**1**) (30 mg, 0.084 mmol) and EtNCS (7.3 mg, 0.084 mmol). Under kinetic conditions, nmr spectroscopy indicated quantitative reaction of **1** to form the intermediate *trans*‑Fe(dmpe)2(SC(H)N+(Et)CO2‑)H (**4**), which was unstable in solution, but which precipitated in small amounts (ca. 2 mg) as red crystals. Further reaction under thermodynamic conditions afforded *cis*‑Fe(dmpe)2(SCH2N(Et)C(O)O‑*S*,*O*) (**5**) as the major product. *Cis*‑Fe(dmpe)2(SCH2N(Et)C(O)O‑*S*,*O*) (**5**) precipitated wholly from the reaction mixture as red columnar crystals (18 mg, 43% (based on *cis*‑Fe(dmpe)2H2 (**1**))).

***(OC‑6‑32)*‑Bis(1,2‑bis(dimethylphosphino)ethane‑*P*,*P*)hydrido(*N*‑ethyl‑*N*‑carboxylatothioformiminidato‑*S*)iron(II), *trans*‑Fe(dmpe)2(SCHN+(Et)CO2‑)H (4).**

**1H nmr** (benzene-*d*6, 300 K)**:** (high and low-field regions only)**:**  ‑25.20 (p, 2*J*PH = 50 Hz, 1H, Fe‑*H*), 9.30 (s, 1H, FeSC*H*N).

**31P{1H} nmr:**  69.4 (s, 4P).

**13C{1H} nmr:** (ligand resonances not assigned)  13.9 (s, FeSCHN+CH2*C*H3), 43.4 (s, FeSCHN+*C*H2CH3), 172.5 (br m), 174.6 (s) (FeS*C*HN+Et and FeSCHN+(Et)*C*O2‑).

**IR** (KBr disc, cm-1)**:** 1376 (sym(CO2)), 1560 (br) (asym(CO2) and (C=N)), 1805 ((Fe-H)), 2967 ((FeS*CH*N)).

**X-ray crystallography:** A red prismatic crystal of suitable quality for X-ray diffraction analysis was grown in benzene‑*d*6 at 300 K. Crystallographic data is presented as supporting information in CIF format.

***(OC‑6‑23)*‑Fe(dmpe‑*P*,*P*)2(SCH2N(Et)C(O)O‑*S*,*O*), *cis*‑Fe(dmpe)2(SCH2N(Et)C(O)O‑*S*,*O*) (5).**

**1H nmr** (tetrahydrofuran-*d*8, 300 K)**:**  0.85 (t, 3*J*HH = 7 Hz, 3H, FeSCH2NCH2C*H*3), 0.95 (m, 6H, 2 x PC*H*3), 0.971.50 (PC*H*2), 1.26 (d, *J*PH = 6 Hz, 3H, PC*H*3), 1.38 (d, *J*PH = 10 Hz, 3H, PC*H*3), 1.53 (d, *J*PH = 5 Hz, 3H, PC*H*3), 1.54 (d, *J*PH = 7 Hz, 3H, PC*H*3), 1.59 (d, *J*PH = 8 Hz, 3H, PC*H*3), 1.67 (d, *J*PH = 9 Hz, 3H, PC*H*3), 1.802.10 (PC*H*2), 2.67 (dq, 3*J*HH = 7 Hz, 2*J*HH = 14 Hz, 1H, FeSCH2NCH*H*Me), 3.26 (d, 2*J*HH = 12 Hz, 1H, FeSCH*H*N), 3.47 (dq, 3*J*HH = 7 Hz, 2*J*HH = 14 Hz, 1H, FeSCH2NC*H*HMe), 3.65 (d, 2*J*HH = 12 Hz, 1H, FeSC*H*HN).

**31P{1H} nmr:**  45.3 (ddd, 2*J*PP = 226, 40, 32 Hz, 1P), 57.9 (ddd, 2*J*PP = 226, 52, 36 Hz, 1P), 60.3 (dt, 2*J*PP = 36, 28 Hz, 1P), 65.2 (dt, 2*J*PP = 28, 52 Hz, 1P).

**13C{1H} nmr:**  8.8 (m, P*C*H3), 11.2 (dd, *J*CP = 20, 50 Hz, 2 x P*C*H3), 14.7 (s, FeSCH2NCH2*C*H3), 15.0 (t, *J*CP = 26 Hz, 2 x P*C*H3), 17.2 (m, P*C*H3), 18.8 (d, *J*CP = 18 Hz, P*C*H3), 19.8 (d, *J*CP = 18 Hz, P*C*H3), 29.3 (dd, *J*CP = 14, 27 Hz, P*C*H2), 30.7 (dd, *J*CP = 17, 19 Hz, P*C*H2), 32.0 (m, P*C*H2), 33.2 (m, P*C*H2), 43.9 (s, FeSCH2N*C*H2Me), 45.9 (m, *J*CP = 3, 5 Hz, FeS*C*H2N), 166.1 (p, 3*J*CP = 3 Hz, FeO*C*(O)N).

**IR** (KBr disc, cm-1)**:** 1311 (sym(CO2)), 1575 (asym(CO2)), 2358, 2900.

**X-ray crystallography:** Red columnar crystals of suitable quality for X-ray diffraction analysis were grown in benzene‑*d*6 at 300 K. Crystallographic data is presented as supporting information in CIF format.

**References**

(1) Shriver, D. F.; Drezdon, M. A. *The Manipulation of Air Sensitive Compounds*; John Wiley and Sons: New York, 1986.

(2) *Purchased from J. Young Ltd. (Catalogue No. VNMR 5).*

(3) Chatt, J.; Hayter, R. G. *J. Chem. Soc.* **1961**, 5507. Whittlesey, M. K.; Mawby, R. J.; Osman, R.; Perutz, R. N.; Field, L. D.; Wilkinson, M. P.; George, M. W. *J. Am. Chem. Soc.* **1993**, *115*, 8627. Baker, M. V.; Field, L. D.; Young, D. J. *Appl. Organomet. Chem.* **1990**, *4*, 551.

(4) Field, L. D.; Messerle, B. A.; Smernik, R. J. *Inorg. Chem.* **1997**, *36*, 5984.
